# Supplementary material for: Chelated orthoborate ionic liquid as a reactant for the synthesis of a new cobalt borophosphate containing extra-large 16-ring channels
Source: Royal Society of Chemistry journal article supplement (doi:10.1039/c0dt00368a), 2010-01-01
Supplement: c0dt00368a.pdf [file c0dt00368a.pdf]

## Supporting information

### Chelated orthoborate ionic liquid as a reactant for the synthesis of a new cobalt borophosphate containing extra-large 16-ring channels

Miao Yang,\* Feifei Xu, Qingshan Liu, Peifang Yan, Xiumei Liu, Chang Wang, Urs  
Welz-Biermann\*

China ionic liquid laboratory, Dalian Institute of Chemical Physics, Chinese Academy of Science,  
Zhongshan Road 457, Dalian 116023, P. R. China

**\*Corresponding Author:**

Assoc. Prof. Dr. Miao Yang

E-mail: [yangmiao@dicp.ac.cn](mailto:yangmiao@dicp.ac.cn)

Prof. Dr. Urs Welz-Biermann

E-mail: [uwb@dicp.ac.cn](mailto:uwb@dicp.ac.cn)

Fax: 0411-84379992

Table S1 Crystallographic data and refinement results of  $(\text{NH}_4)_7\text{Co}_4(\text{H}_2\text{O})[\text{B}_2\text{P}_4\text{O}_{15}(\text{OH})_2]_2[\text{H}_2\text{PO}_4][\text{HPO}_4]$ .<sup>a</sup>

|                                      |                                                                          |
|--------------------------------------|--------------------------------------------------------------------------|
| Empirical formula                    | $\text{H}_{37}\text{B}_4\text{Co}_4\text{N}_7\text{O}_{43}\text{P}_{10}$ |
| Formula weight                       | 1412.03                                                                  |
| Temperature                          | 293(2) K                                                                 |
| Wavelength                           | 0.71073 Å                                                                |
| Crystal system, space group          | Orthorhombic, <i>Pnma</i> (No.62)                                        |
| Unit cell dimensions                 | $a = 16.9206(7)$ Å<br>$b = 10.5592(5)$ Å<br>$c = 21.9997(10)$ Å          |
| Volume                               | $3930.6(3)$ Å <sup>3</sup>                                               |
| Z, Calculated density                | 4, 2.386 g/cm <sup>3</sup>                                               |
| Absorption coefficient               | $2.211 \text{ mm}^{-1}$                                                  |
| $F(000)$                             | 2832                                                                     |
| Crystal size                         | $0.25 \times 0.10 \times 0.08 \text{ mm}^3$                              |
| Theta range for data collection      | 2.14 to 28°                                                              |
| Limiting indices                     | $-22 \leq h \leq 22, -13 \leq k \leq 10, -26 \leq l \leq 29$             |
| Reflections collected / unique       | 25209 / 4935 [ $R(\text{int}) = 0.0346$ ]                                |
| Completeness to theta = 28.00        | 98.8 %                                                                   |
| Absorption correction                | Semi-empirical from equivalents                                          |
| Max. and min. transmission           | 0.8430 and 0.6079                                                        |
| Refinement method                    | Full-matrix least-squares on $F^2$                                       |
| Data / restraints / parameters       | 4935 / 70 / 416                                                          |
| Goodness-of-fit on $F^2$             | 1.039                                                                    |
| Final R indices [ $I > 2\sigma(I)$ ] | $R_1 = 0.0293, wR_2 = 0.0783$                                            |
| R indices (all data)                 | $R_1 = 0.0344, wR_2 = 0.0808$                                            |
| Extinction coefficient               | 0.00037(9)                                                               |
| Largest diff. peak and hole          | 1.197 and -0.482 e Å <sup>-3</sup>                                       |

<sup>a</sup>  $R_1 = \sum(\Delta F / \sum(F_o))$ ;  $wR_2 = (\sum[w(F_o^2 - F_c^2)]) / \sum[w(F_o^2)^2]^{1/2}$ ,  $w = 1/\sigma^2(F_o^2)$

Table S2 Atomic coordinates ( $\times 10^4$ ) and equivalent isotropic displacement parameters ( $\text{\AA}^2 \times 10^3$ ) for  $(\text{NH}_4)_7\text{Co}_4(\text{H}_2\text{O})[\text{B}_2\text{P}_4\text{O}_{15}(\text{OH})_2]_2[\text{H}_2\text{PO}_4][\text{HPO}_4]$ .<sup>a</sup>

|       | x       | y        | z        | U(eq) |
|-------|---------|----------|----------|-------|
| Co(1) | 6427(1) | -2500    | 7597(1)  | 12(1) |
| Co(2) | 7597(1) | 2500     | 6356(1)  | 10(1) |
| Co(3) | 6877(1) | 2500     | 7673(1)  | 10(1) |
| Co(4) | 6472(1) | -2500    | 9098(1)  | 14(1) |
| P(1)  | 8061(1) | -2037(1) | 8283(1)  | 21(1) |
| P(2)  | 5104(1) | 2500     | 5071(1)  | 25(1) |
| P(3)  | 6058(1) | 173(1)   | 8406(1)  | 12(1) |
| P(4)  | 7202(1) | -563(1)  | 10220(1) | 13(1) |
| P(5)  | 8833(1) | 2500     | 7502(1)  | 10(1) |
| P(6)  | 6408(1) | 243(1)   | 6734(1)  | 10(1) |
| P(7)  | 4534(1) | -2162(1) | 9229(1)  | 19(1) |
| B(1)  | 6356(2) | 1296(2)  | 5574(1)  | 13(1) |
| B(2)  | 5228(1) | 1283(2)  | 7468(1)  | 11(1) |
| O(1)  | 5779(1) | 461(2)   | 9073(1)  | 26(1) |
| O(2)  | 5348(2) | -2500    | 9417(1)  | 24(1) |
| O(3)  | 5069(2) | 2500     | 4389(2)  | 48(1) |
| O(4)  | 4313(2) | -2500    | 8587(1)  | 28(1) |
| O(5)  | 5324(1) | 484(2)   | 8018(1)  | 18(1) |
| O(6)  | 9372(1) | 1330(1)  | 7658(1)  | 12(1) |
| O(7)  | 8061(1) | 1047(2)  | 5834(1)  | 17(1) |
| O(8)  | 8118(1) | 2500     | 7906(1)  | 15(1) |
| O(9)  | 7678(2) | -2500    | 8876(1)  | 24(1) |
| O(10) | 7018(1) | 1211(1)  | 6950(1)  | 12(1) |
| O(11) | 3905(2) | -2500    | 9695(2)  | 37(1) |
| O(12) | 5215(2) | -2500    | 7529(1)  | 32(1) |
| O(13) | 6547(1) | 2500     | 5852(1)  | 12(1) |
| O(14) | 8073(1) | -952(2)  | 10087(1) | 16(1) |
| O(15) | 5572(1) | 1311(2)  | 5291(1)  | 20(1) |
| O(16) | 8940(2) | -2500    | 8287(1)  | 33(1) |
| O(17) | 8639(1) | 2500     | 6834(1)  | 15(1) |
| O(18) | 7219(1) | 918(2)   | 10213(1) | 22(1) |
| O(19) | 5563(1) | 620(2)   | 6936(1)  | 18(1) |
| O(20) | 6677(1) | -1001(2) | 9704(1)  | 21(1) |
| O(21) | 6262(1) | -1224(2) | 8364(1)  | 15(1) |
| O(22) | 5589(1) | 2500     | 7559(1)  | 12(1) |
| O(23) | 7644(2) | -2500    | 7731(1)  | 22(1) |
| O(24) | 6604(1) | -1081(2) | 6933(1)  | 17(1) |
| O(25) | 6754(1) | 1004(2)  | 8252(1)  | 24(1) |
| O(26) | 6369(1) | 250(2)   | 6027(1)  | 13(1) |
| O(27) | 8068(2) | -517(4)  | 8298(2)  | 29(1) |
| O(28) | 4307(2) | 2500     | 5362(2)  | 47(1) |

|        |           |           |           |       |
|--------|-----------|-----------|-----------|-------|
| O(29)  | 4467(2)   | -670(4)   | 9300(2)   | 33(1) |
| N(1)   | -1548(2)  | -535(2)   | 6889(1)   | 32(1) |
| N(2)   | 4400(2)   | -41(4)    | 6011(2)   | 60(1) |
| N(3)   | 2760(3)   | 2500      | 5848(2)   | 44(1) |
| N(4)   | -409(2)   | 2500      | 5711(2)   | 31(1) |
| N(5)   | 1617(2)   | -2500     | 9176(1)   | 20(1) |
| H(1)   | 5860(30)  | 80(40)    | 9370(19)  | 80    |
| H(122) | 4960(40)  | -2500     | 7260(30)  | 80    |
| H(121) | 4940(40)  | -2500     | 7910(30)  | 80    |
| H(16)  | 9120(40)  | -2500     | 8640(20)  | 80    |
| H(18)  | 6790(20)  | 1240(40)  | 10250(20) | 80    |
| H(27)  | 7967      | 0         | 8742      | 34    |
| H(29)  | 5030      | -446      | 9392      | 40    |
| H(14)  | -2003(15) | -880(30)  | 7046(16)  | 80    |
| H(13)  | -1270(20) | -110(30)  | 7190(13)  | 80    |
| H(12)  | -1233(19) | -1190(30) | 6737(16)  | 80    |
| H(11)  | -1660(20) | 20(30)    | 6577(13)  | 80    |
| H(21)  | 3853(12)  | -100(40)  | 6126(17)  | 80    |
| H(22)  | 4690(20)  | 180(30)   | 6356(12)  | 80    |
| H(23)  | 4560(20)  | -800(20)  | 5843(15)  | 80    |
| H(24)  | 4430(20)  | 620(30)   | 5724(14)  | 80    |
| H(31)  | 2870(30)  | 2500      | 6269(8)   | 80    |
| H(32)  | 3264(16)  | 2500      | 5670(20)  | 80    |
| H(33)  | 2560(20)  | 1680(20)  | 5779(14)  | 80    |
| H(43)  | -470(30)  | 2500      | 5287(7)   | 80    |
| H(41)  | -160(20)  | 1750(30)  | 5821(15)  | 80    |
| H(42)  | -913(15)  | 2500      | 5880(20)  | 80    |
| H(52)  | 1660(30)  | -2500     | 8747(7)   | 80    |
| H(53)  | 1880(20)  | -1790(30) | 9336(16)  | 80    |
| H(51)  | 1077(11)  | -2500     | 9280(20)  | 80    |

---

<sup>a</sup>  $U(\text{eq})$  is defined as one third of the trace of the orthogonalized  $U_{ij}$  tensor.

Table S3 Bond lengths [Å] and angles [°] for (NH<sub>4</sub>)<sub>7</sub>Co<sub>4</sub>(H<sub>2</sub>O)[B<sub>2</sub>P<sub>4</sub>O<sub>15</sub>(OH)<sub>2</sub>]<sub>2</sub>[H<sub>2</sub>PO<sub>4</sub>][HPO<sub>4</sub>].<sup>a</sup>

|                     |            |                      |            |
|---------------------|------------|----------------------|------------|
| Co(1)-O(12)         | 2.056(3)   | Co(3)-O(25)#2        | 2.0400(17) |
| Co(1)-O(23)         | 2.080(3)   | Co(3)-O(25)          | 2.0400(17) |
| Co(1)-O(24)#1       | 2.1143(17) | Co(3)-O(10)#2        | 2.1070(16) |
| Co(1)-O(24)         | 2.1143(17) | Co(3)-O(10)          | 2.1070(16) |
| Co(1)-O(21)         | 2.1777(16) | Co(3)-O(8)           | 2.162(2)   |
| Co(1)-O(21)#1       | 2.1777(16) | Co(3)-O(22)          | 2.194(2)   |
| Co(2)-O(17)         | 2.054(2)   | Co(4)-O(2)           | 2.027(3)   |
| Co(2)-O(7)          | 2.0705(16) | Co(4)-O(20)#1        | 2.0978(17) |
| Co(2)-O(7)#2        | 2.0705(17) | Co(4)-O(20)          | 2.0979(17) |
| Co(2)-O(13)         | 2.094(2)   | Co(4)-O(9)           | 2.100(3)   |
| Co(2)-O(10)         | 2.1267(16) | Co(4)-O(21)#1        | 2.1326(16) |
| Co(2)-O(10)#2       | 2.1267(16) | Co(4)-O(21)          | 2.1327(16) |
| P(1)-O(23)          | 1.487(3)   | P(4)-O(7)#3          | 1.5099(17) |
| P(1)-O(9)           | 1.538(3)   | P(4)-O(20)           | 1.5149(17) |
| P(1)-O(16)          | 1.566(3)   | P(4)-O(14)           | 1.5571(17) |
| P(1)-O(27)          | 1.605(4)   | P(4)-O(18)           | 1.5644(18) |
| P(2)-O(28)          | 1.493(3)   | P(5)-O(8)            | 1.501(2)   |
| P(2)-O(3)           | 1.502(4)   | P(5)-O(17)           | 1.506(2)   |
| P(2)-O(15)#2        | 1.5613(18) | P(5)-O(6)#2          | 1.5730(16) |
| P(2)-O(15)          | 1.5613(17) | P(5)-O(6)            | 1.5731(16) |
| P(3)-O(25)          | 1.5082(18) | P(6)-O(24)           | 1.5021(17) |
| P(3)-O(21)          | 1.5172(17) | P(6)-O(10)           | 1.5280(16) |
| P(3)-O(5)           | 1.5428(17) | P(6)-O(19)           | 1.5502(16) |
| P(3)-O(1)           | 1.5697(19) | P(6)-O(26)           | 1.5561(17) |
| P(7)-O(2)           | 1.480(3)   | P(7)-O(11)           | 1.520(3)   |
| P(7)-O(4)           | 1.506(3)   | P(7)-O(29)           | 1.586(4)   |
| B(1)-O(13)          | 1.447(3)   | B(2)-O(22)           | 1.436(3)   |
| B(1)-O(15)          | 1.466(3)   | B(2)-O(6)#5          | 1.476(3)   |
| B(1)-O(26)          | 1.488(3)   | B(2)-O(19)           | 1.478(3)   |
| B(1)-O(14)#4        | 1.488(3)   | B(2)-O(5)            | 1.483(3)   |
| O(12)-Co(1)-O(23)   | 176.00(12) | O(17)-Co(2)-O(7)     | 87.66(7)   |
| O(12)-Co(1)-O(24)#1 | 95.21(8)   | O(17)-Co(2)-O(7)#2   | 87.66(7)   |
| O(23)-Co(1)-O(24)#1 | 87.61(7)   | O(7)-Co(2)-O(7)#2    | 95.64(10)  |
| O(12)-Co(1)-O(24)   | 95.21(8)   | O(17)-Co(2)-O(13)    | 178.90(9)  |
| O(23)-Co(1)-O(24)   | 87.61(7)   | O(7)-Co(2)-O(13)     | 91.60(6)   |
| O(24)#1-Co(1)-O(24) | 90.22(9)   | O(7)#2-Co(2)-O(13)   | 91.60(6)   |
| O(12)-Co(1)-O(21)   | 85.91(8)   | O(17)-Co(2)-O(10)    | 94.60(7)   |
| O(23)-Co(1)-O(21)   | 90.95(7)   | O(7)-Co(2)-O(10)     | 92.35(6)   |
| O(24)#1-Co(1)-O(21) | 172.93(6)  | O(7)#2-Co(2)-O(10)   | 171.78(7)  |
| O(24)-Co(1)-O(21)   | 96.63(6)   | O(13)-Co(2)-O(10)    | 86.24(6)   |
| O(12)-Co(1)-O(21)#1 | 85.91(8)   | O(17)-Co(2)-O(10)#2  | 94.60(7)   |
| O(23)-Co(1)-O(21)#1 | 90.95(7)   | 5 O(7)-Co(2)-O(10)#2 | 171.78(7)  |

---

|                       |            |                       |            |
|-----------------------|------------|-----------------------|------------|
| O(24)#1-Co(1)-O(21)#1 | 96.64(6)   | O(7)#2-Co(2)-O(10)#2  | 92.35(6)   |
| O(24)-Co(1)-O(21)#1   | 172.93(6)  | O(13)-Co(2)-O(10)#2   | 86.24(6)   |
| O(21)-Co(1)-O(21)#1   | 76.46(9)   | O(10)-Co(2)-O(10)#2   | 79.60(8)   |
| O(25)#2-Co(3)-O(25)   | 101.46(12) | O(2)-Co(4)-O(20)#1    | 86.34(7)   |
| O(25)#2-Co(3)-O(10)#2 | 89.01(7)   | O(2)-Co(4)-O(20)      | 86.34(7)   |
| O(25)-Co(3)-O(10)#2   | 169.51(7)  | O(20)#1-Co(4)-O(20)   | 97.97(10)  |
| O(25)#2-Co(3)-O(10)   | 169.50(7)  | O(2)-Co(4)-O(9)       | 173.22(11) |
| O(25)-Co(3)-O(10)     | 89.02(7)   | O(20)#1-Co(4)-O(9)    | 89.21(7)   |
| O(10)#2-Co(3)-O(10)   | 80.50(9)   | O(20)-Co(4)-O(9)      | 89.21(7)   |
| O(25)#2-Co(3)-O(8)    | 87.16(7)   | O(2)-Co(4)-O(21)#1    | 96.08(7)   |
| O(25)-Co(3)-O(8)      | 87.16(7)   | O(20)#1-Co(4)-O(21)#1 | 91.80(7)   |
| O(10)#2-Co(3)-O(8)    | 93.98(6)   | O(20)-Co(4)-O(21)#1   | 170.07(7)  |
| O(10)-Co(3)-O(8)      | 93.98(6)   | O(9)-Co(4)-O(21)#1    | 89.17(7)   |
| O(25)#2-Co(3)-O(22)   | 88.27(6)   | O(2)-Co(4)-O(21)      | 96.08(7)   |
| O(25)-Co(3)-O(22)     | 88.27(6)   | O(20)#1-Co(4)-O(21)   | 170.07(7)  |
| O(10)#2-Co(3)-O(22)   | 91.53(6)   | O(20)-Co(4)-O(21)     | 91.80(7)   |
| O(10)-Co(3)-O(22)     | 91.53(6)   | O(9)-Co(4)-O(21)      | 89.17(7)   |
| O(8)-Co(3)-O(22)      | 172.78(9)  | O(21)#1-Co(4)-O(21)   | 78.38(9)   |
| O(23)-P(1)-O(9)       | 112.85(15) | O(28)-P(2)-O(3)       | 113.1(2)   |
| O(23)-P(1)-O(16)      | 110.71(16) | O(28)-P(2)-O(15)#2    | 108.96(12) |
| O(9)-P(1)-O(16)       | 107.23(16) | O(3)-P(2)-O(15)#2     | 109.27(12) |
| O(23)-P(1)-O(27)      | 110.46(17) | O(28)-P(2)-O(15)      | 108.96(12) |
| O(9)-P(1)-O(27)       | 107.62(18) | O(3)-P(2)-O(15)       | 109.27(12) |
| O(16)-P(1)-O(27)      | 107.76(16) | O(15)#2-P(2)-O(15)    | 107.09(13) |
| O(25)-P(3)-O(21)      | 111.96(11) | O(7)#3-P(4)-O(20)     | 113.26(10) |
| O(25)-P(3)-O(5)       | 112.29(10) | O(7)#3-P(4)-O(14)     | 110.99(9)  |
| O(21)-P(3)-O(5)       | 110.90(10) | O(20)-P(4)-O(14)      | 109.42(10) |
| O(25)-P(3)-O(1)       | 109.42(12) | O(7)#3-P(4)-O(18)     | 110.70(10) |
| O(21)-P(3)-O(1)       | 108.33(10) | O(20)-P(4)-O(18)      | 107.92(10) |
| O(5)-P(3)-O(1)        | 103.53(11) | O(14)-P(4)-O(18)      | 104.11(10) |
| O(8)-P(5)-O(17)       | 113.70(13) | O(24)-P(6)-O(10)      | 112.55(10) |
| O(8)-P(5)-O(6)#2      | 109.76(8)  | O(24)-P(6)-O(19)      | 111.02(10) |
| O(17)-P(5)-O(6)#2     | 109.83(8)  | O(10)-P(6)-O(19)      | 111.22(9)  |
| O(8)-P(5)-O(6)        | 109.76(8)  | O(24)-P(6)-O(26)      | 107.73(9)  |
| O(17)-P(5)-O(6)       | 109.83(8)  | O(10)-P(6)-O(26)      | 109.66(9)  |
| O(6)#2-P(5)-O(6)      | 103.46(12) | O(19)-P(6)-O(26)      | 104.27(9)  |
| O(2)-P(7)-O(4)        | 115.80(16) | O(13)-B(1)-O(15)      | 111.9(2)   |
| O(2)-P(7)-O(11)       | 114.04(18) | O(13)-B(1)-O(26)      | 111.47(19) |
| O(4)-P(7)-O(11)       | 113.73(18) | O(15)-B(1)-O(26)      | 107.82(18) |
| O(2)-P(7)-O(29)       | 106.20(17) | O(13)-B(1)-O(14)#4    | 111.9(2)   |
| O(4)-P(7)-O(29)       | 108.05(19) | O(15)-B(1)-O(14)#4    | 106.54(19) |
| O(11)-P(7)-O(29)      | 96.72(17)  | O(26)-B(1)-O(14)#4    | 106.94(18) |
| O(22)-B(2)-O(6)#5     | 114.40(19) | O(22)-B(2)-O(5)       | 110.4(2)   |
| O(22)-B(2)-O(19)      | 111.78(19) | O(6)#5-B(2)-O(5)      | 106.32(18) |

---

---

|                   |            |                 |            |
|-------------------|------------|-----------------|------------|
| O(6)#5-B(2)-O(19) | 104.03(18) | O(19)-B(2)-O(5) | 109.55(18) |
|-------------------|------------|-----------------|------------|

---

"Symmetry transformations used to generate equivalent atoms: #1  $x, -y-1/2, z$  #2  $x, -y+1/2, z$   
#3  $-x+3/2, -y, z+1/2$  #4  $-x+3/2, -y, z-1/2$  #5  $x-1/2, y, -z+3/2$ .

Table S4 Hydrogen bonds for  $(\text{NH}_4)_7\text{Co}_4(\text{H}_2\text{O})[\text{B}_2\text{P}_4\text{O}_{15}(\text{OH})_2]_2[\text{H}_2\text{PO}_4][\text{HPO}_4]$ .<sup>a</sup>

| D-H...A                | d(D-H) [Å] | d(H...A) [Å] | d(D...A) [Å] | <(DHA) [°] |
|------------------------|------------|--------------|--------------|------------|
| O(1)-H(1)...O(20)      | 0.78(4)    | 1.93(4)      | 2.573(3)     | 139(5)     |
| O(12)-H(122)...O(16)#2 | 0.73(7)    | 2.10(8)      | 2.806(4)     | 162(8)     |
| O(12)-H(121)...O(4)    | 0.96(7)    | 1.83(8)      | 2.782(4)     | 173(6)     |
| O(16)-H(16)...O(3)#1   | 0.84(4)    | 2.14(5)      | 2.948(5)     | 161(7)     |
| O(18)-H(18)...O(11)#3  | 0.81(4)    | 1.78(4)      | 2.540(3)     | 157(5)     |
| O(18)-H(18)...O(29)#3  | 0.81(4)    | 2.42(4)      | 3.060(4)     | 137(4)     |
| O(29)-H(29)...O(1)     | 1.00       | 1.74         | 2.569(5)     | 137.8      |
| N(1)-H(14)...O(23)#4   | 0.920(18)  | 2.36(3)      | 3.101(3)     | 138(3)     |
| N(1)-H(14)...O(24)#4   | 0.920(18)  | 2.38(3)      | 3.182(3)     | 146(3)     |
| N(1)-H(13)...O(6)#4    | 0.925(18)  | 2.14(2)      | 3.028(3)     | 161(3)     |
| N(1)-H(12)...O(4)#2    | 0.935(18)  | 1.808(18)    | 2.742(3)     | 176(4)     |
| N(1)-H(12)...O(29)#2   | 0.935(18)  | 2.63(3)      | 3.132(5)     | 114(3)     |
| N(1)-H(11)...O(7)#4    | 0.925(18)  | 2.015(18)    | 2.935(3)     | 173(3)     |
| N(2)-H(21)...O(27)#2   | 0.962(18)  | 1.89(2)      | 2.765(5)     | 150(3)     |
| N(2)-H(22)...O(19)     | 0.928(18)  | 2.01(2)      | 2.916(4)     | 164(3)     |
| N(2)-H(22)...O(6)#2    | 0.928(18)  | 2.54(3)      | 3.267(4)     | 135(3)     |
| N(2)-H(23)...O(3)#5    | 0.919(18)  | 1.973(18)    | 2.885(4)     | 171(3)     |
| N(2)-H(23)...O(15)#5   | 0.919(18)  | 2.56(3)      | 3.162(4)     | 123(3)     |
| N(2)-H(24)...O(28)     | 0.944(18)  | 2.15(2)      | 3.043(4)     | 158(3)     |
| N(2)-H(24)...O(15)     | 0.944(18)  | 2.27(3)      | 2.912(4)     | 124(3)     |
| N(3)-H(31)...O(8)#2    | 0.945(15)  | 1.861(15)    | 2.806(5)     | 179(5)     |
| N(3)-H(32)...O(28)     | 0.942(15)  | 1.887(16)    | 2.827(6)     | 175(5)     |
| N(3)-H(33)...O(18)#2   | 0.937(14)  | 2.40(3)      | 3.013(4)     | 123(3)     |
| N(4)-H(43)...O(2)#6    | 0.937(15)  | 1.925(18)    | 2.849(5)     | 168(5)     |
| N(4)-H(41)...O(1)#2    | 0.931(14)  | 2.104(19)    | 2.983(3)     | 157(3)     |
| N(4)-H(41)...O(29)#2   | 0.931(14)  | 2.64(4)      | 3.354(4)     | 134(4)     |
| N(4)-H(42)...O(17)#4   | 0.932(15)  | 2.23(4)      | 2.951(4)     | 134(4)     |
| N(4)-H(42)...O(7)#4    | 0.932(15)  | 2.32(2)      | 3.022(4)     | 131.8(19)  |
| N(4)-H(42)...O(7)#7    | 0.932(15)  | 2.32(2)      | 3.022(4)     | 131.8(19)  |
| N(5)-H(52)...O(24)#8   | 0.947(15)  | 2.119(12)    | 2.861(3)     | 134.3(7)   |
| N(5)-H(52)...O(24)#5   | 0.947(15)  | 2.119(12)    | 2.861(3)     | 134.3(7)   |
| N(5)-H(53)...O(18)#3   | 0.944(14)  | 2.04(2)      | 2.912(3)     | 154(4)     |
| N(5)-H(53)...O(26)#2   | 0.944(14)  | 2.45(4)      | 2.9674(17)   | 114(3)     |
| N(5)-H(51)...O(3)#9    | 0.945(15)  | 1.952(16)    | 2.891(5)     | 172(4)     |
| N(5)-H(51)...O(28)#9   | 0.945(15)  | 2.46(4)      | 3.042(5)     | 120(4)     |

<sup>a</sup>Symmetry transformations used to generate equivalent atoms: #1  $-x+3/2, -y, z+1/2$  #2  $x-1/2, y, -z+3/2$  #3  $-x+1, -y, -z+2$  #4  $x-1, y, z$  #5  $-x+1, -y, -z+1$  #6  $-x+1/2, -y, z-1/2$  #7  $x-1, -y+1/2, z$  #8  $x-1/2, -y-1/2, -z+3/2$  #9  $-x+1/2, -y, z+1/2$ .



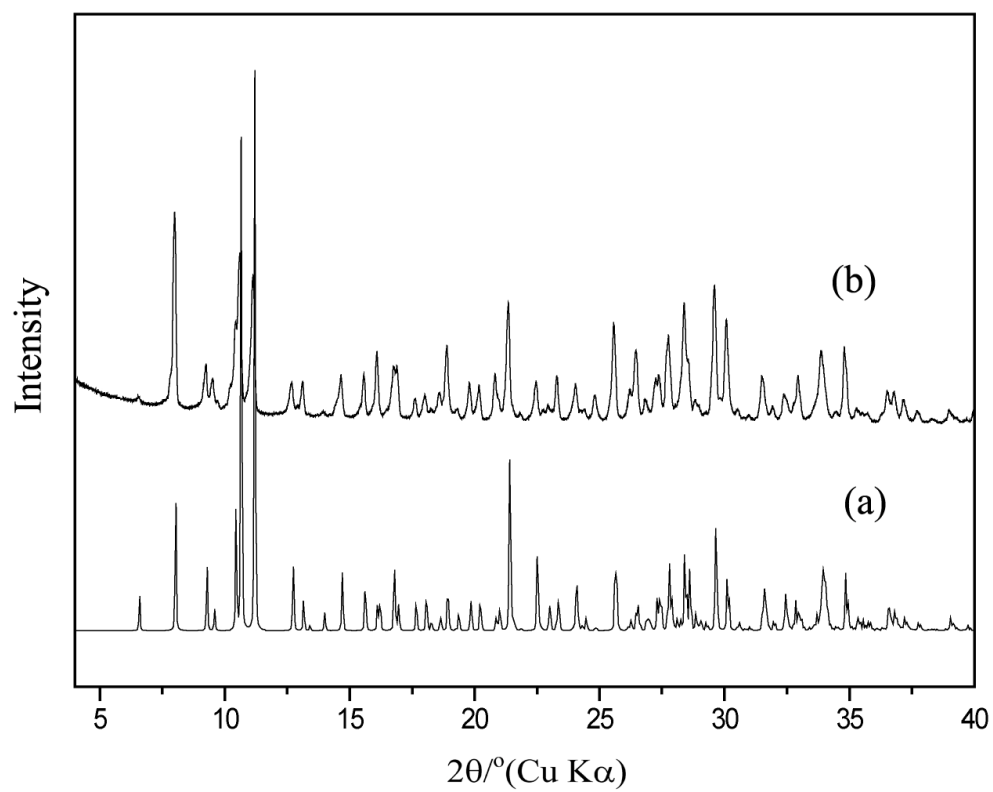

Fig. S1 Simulated (a) and experimental (b) XRD of **1**

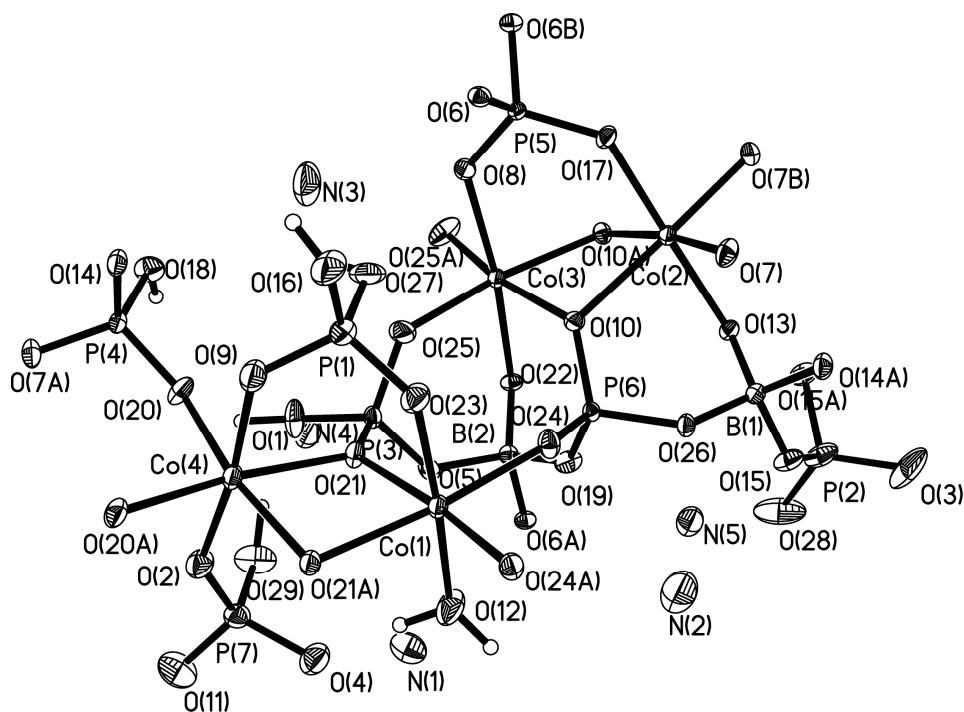

Fig. S2 Thermal ellipsoid plot (50% probability) and atomic labeling scheme of **1**

The TG-DSC measurements have been done by using a Netzsch differential scanning calorimeter (model: DSC 204), as seen in figure S3. It gives a total weight loss of 20.5 wt%. The first slight weight loss of about 0.5 wt% observed before 200 °C corresponds to the removal of physically absorbed water. A strong weight loss of about 19.4 wt % occurring from 200 to 660 °C is attributed to the removal of NH<sub>3</sub> molecules (calcd. 8.4 wt%) and the loss of H<sub>2</sub>O molecules condensation from OH groups (calcd. 10.2 wt% ). The remaining weight loss of about 0.6 wt % taking place after 660 °C may be due to the loss of some boron oxide which are volatile at high temperature.

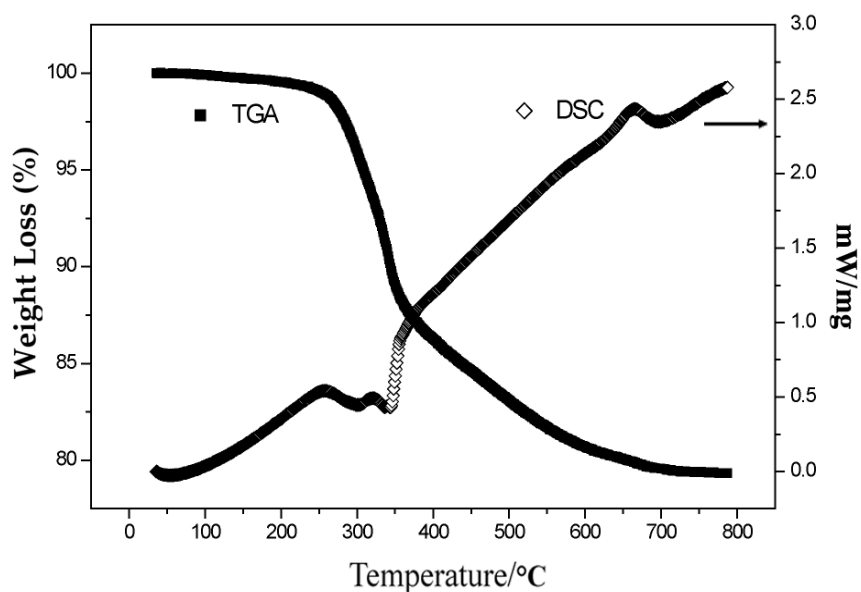

Fig. S3 TG and DSC curves of compound 1

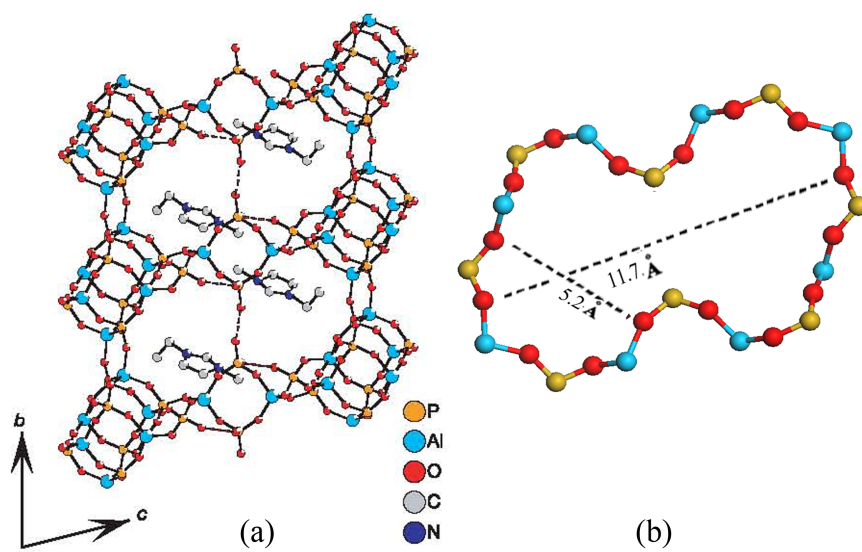

Fig. S4 The open framework of SIZ-1 (a) and the details of 16-ring channels (b)

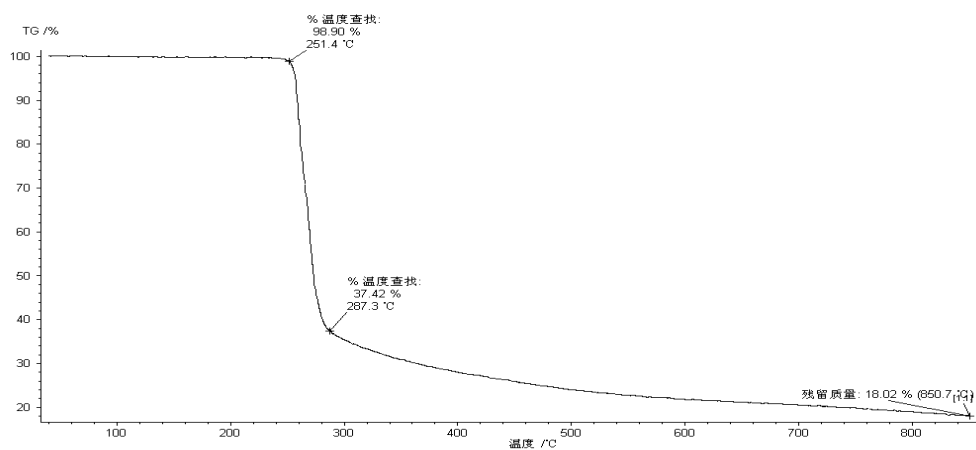

Fig. S5 TG of [Emim][BOB]

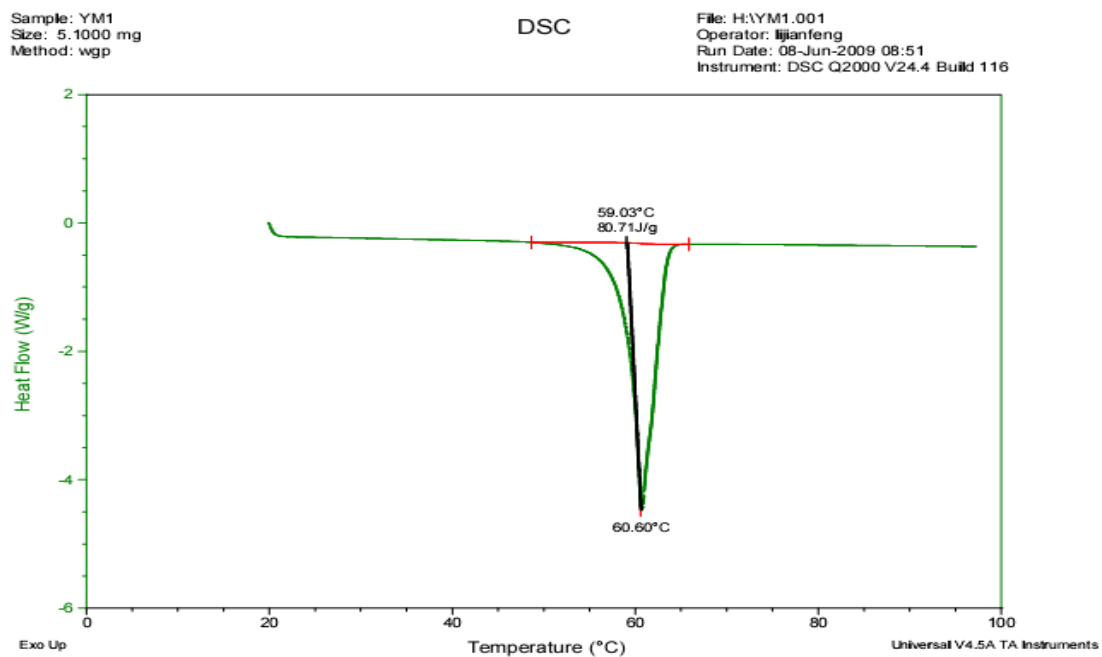

Fig. S6 DSC of [Emim][BOB]
